# Supplementary material for: A novel activating strategy to achieve highly porous carbon monoliths for CO2 capture
Source: Royal Society of Chemistry journal article supplement (doi:10.1039/c3ta14684g), 2014-01-01
Supplement: c3ta14684g.pdf [file c3ta14684g.pdf]

## **Electronic supplementary information (ESI)**

### **A novel activating strategy to achieve highly porous carbon monolith for CO<sub>2</sub> capture**

**Xiaoyu Ma, Yao Li, Minhua Cao\* and Changwen Hu\***

Key Laboratory of Cluster Science, Ministry of Education of China,  
Beijing Key Laboratory of Photoelectronic/Electrophotonic Conversion  
Materials, Department of Chemistry, Beijing Institute of Technology,  
Beijing 100081, P. R. China.

**Fig. S1** XPS P2p spectra of the samples (a) SA-2N-P and (b) SA-N-2P, respectively.

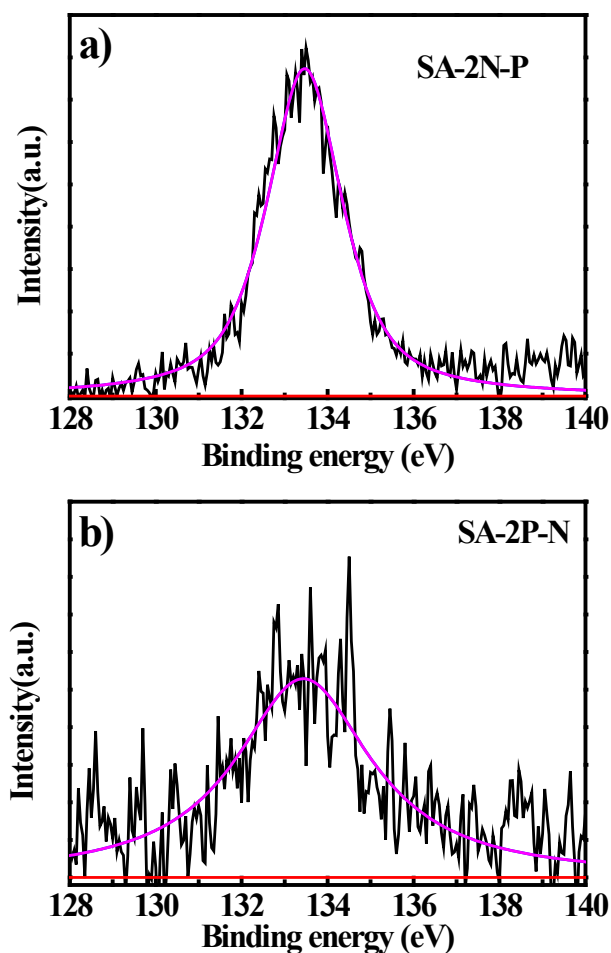

The high-resolution P2p XPS spectra of the samples (a) SA-2N-P and (b) SA-N-2P are shown in Figure S1. Two samples both display only one peak of P2p at 133.3 eV, which can be assigned to P-O bonding. However, the peak of P2p of P-C centered at 130.6 eV cannot be found, indicating that the P species exhibit in the form of  $\text{PO}_4^{3-}$ .

## The Ideal Adsorption Solution Theory (IAST) calculations.

### 1. Pure component isotherm fitting

The pure component adsorption isotherms of CO<sub>2</sub> and N<sub>2</sub> on the SA-2N-P at 298 K and pressure up to 1 atm are given in Fig. 6a.

The experimental adsorption isotherms were fitted with a dual-site Langmuir model as follows:<sup>S4-S7</sup>

$$q = q_A + q_B = \frac{q_{sat,A} b_A p}{1 + b_A p} + \frac{q_{sat,B} b_B p}{1 + b_B p} \quad (1)$$

where we have two distinct adsorption sites A and B;  $b_i$  dual-Langmuir constant (Pa<sup>-1</sup>);  $q_i$  molar loading of species  $i$ , mmol g<sup>-1</sup>;  $q_{sat,i}$  saturation capacity of species  $i$ , mmol g<sup>-1</sup>.

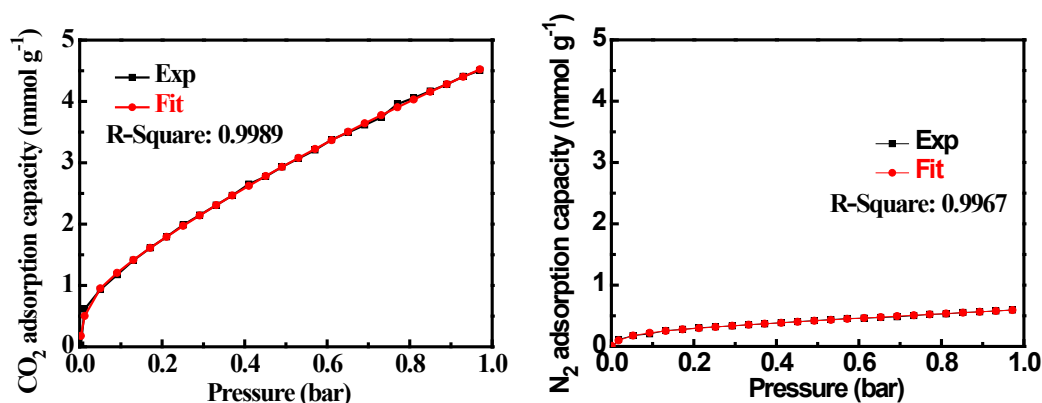

**Fig. S2.** CO<sub>2</sub> and N<sub>2</sub> gas adsorption isotherms for SA-2N-P at 298 K (black). The red lines correspond to dual-site Langmuir equation fit.

2. The adsorption selectivity,  $S_{ads}$ , for binary mixtures of **1** and **2**, is defined as follows:

$$S_{ads} = \frac{q_1 / q_2}{p_1 / p_2} \quad (2)$$

where  $q_i$  is the amount of  $i$  adsorbed and  $p_i$  is the partial pressure of  $i$  in the mixture

for CO<sub>2</sub> over N<sub>2</sub> in flue-gas streams (typically 15% CO<sub>2</sub> and 85% N<sub>2</sub>) was estimated from the experimental single-component isotherms. The SA-2N-P exhibits high adsorption selectivity of 29 for CO<sub>2</sub> over N<sub>2</sub> at 295 K and 1 bar.

## References:

- S1. Z. W Liu, F. Peng, H. J. Wang, H. Yu, W. X. Zheng and J. Yang, *Angew. Chem. Int. Ed.*, 2011, **123**, 3315.
- S2. D. S. Yang, D. Bhattacharjya, S. Inamdar, J. Park and J. S. Yu, *J. Am. Chem. Soc.* 2012, **134**, 16127.
- S3. C. H. Choi, S. H. Park and S. I. Woo, *J. Mater. Chem.*, 2012, **22**, 12107
- S4. W. G. Lu, J. P. Sculley, D. Q. Yuan, R. Krishna, Z. W. Wei, and H. C. Zhou, *Angew. Chem., Int. Ed.*, 2012, **51**, 7480.
- S5. W. G. Lu, D. Q. Yuan, J. Sculley, D. Zhao, R. Krishna and H. C. Zhou, *J. Am. Chem. Soc.*, 2011, **133**, 18126.
- S6. Y. F. Zhao, L. Zhao, K. X. Yao, Y. Yang, Q. Zhang and Y. Han, *J. Mater. Chem.*, 2012, **22**, 19726.
- S7. Y. F. Zhao, X. Liu, K. X. Yao, L. Zhao and Y. Han, *Chem. Mater.*, 2012, **24**, 4725.
